# Supplementary material
Source: Springer Nature journal article supplement (https://www.springermedizin.de/resource/supplementary/13054_2010_9449_MOESM2_ESM.pdf/9706168)

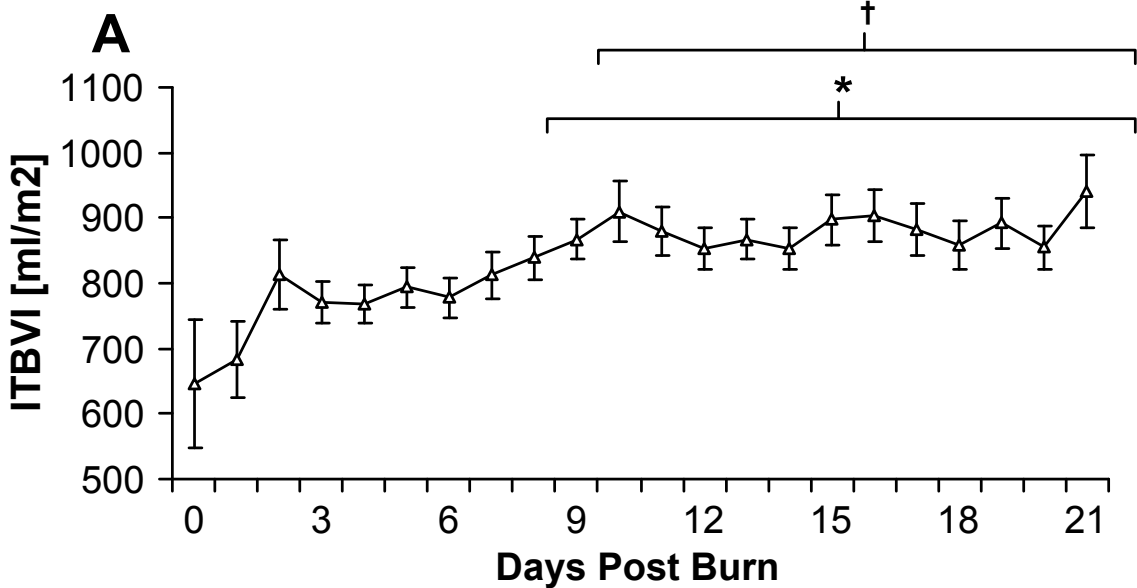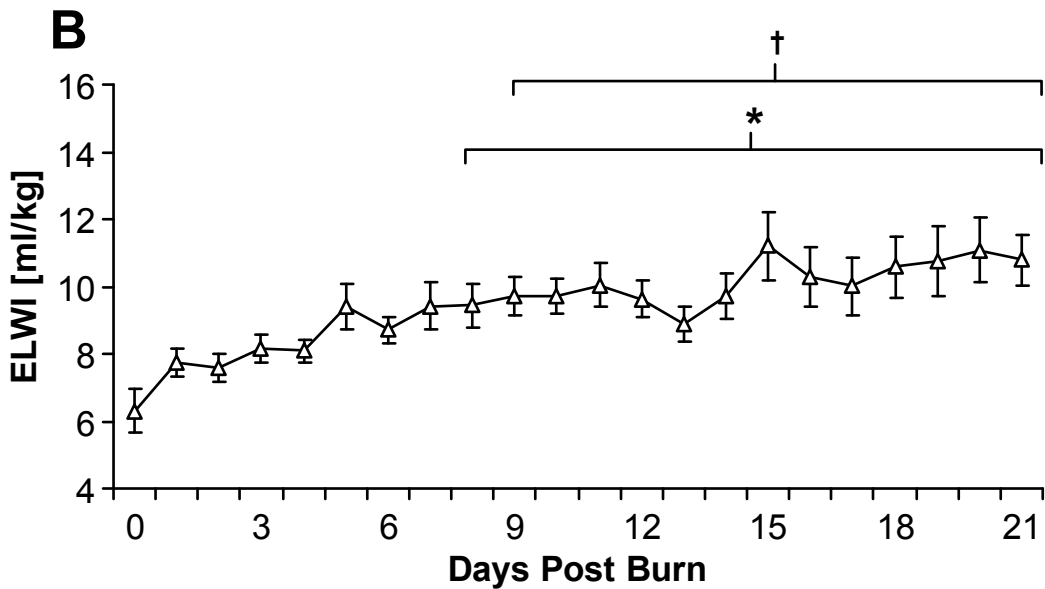

Supplement: MOESM2 [file 9706168]
